# Supplementary material
Source: PubMed Central journal article supplement (PMC3430808)
Supplement: NIHMS369065-supplement-01.pdf [file NIHMS369065-supplement-01.pdf]

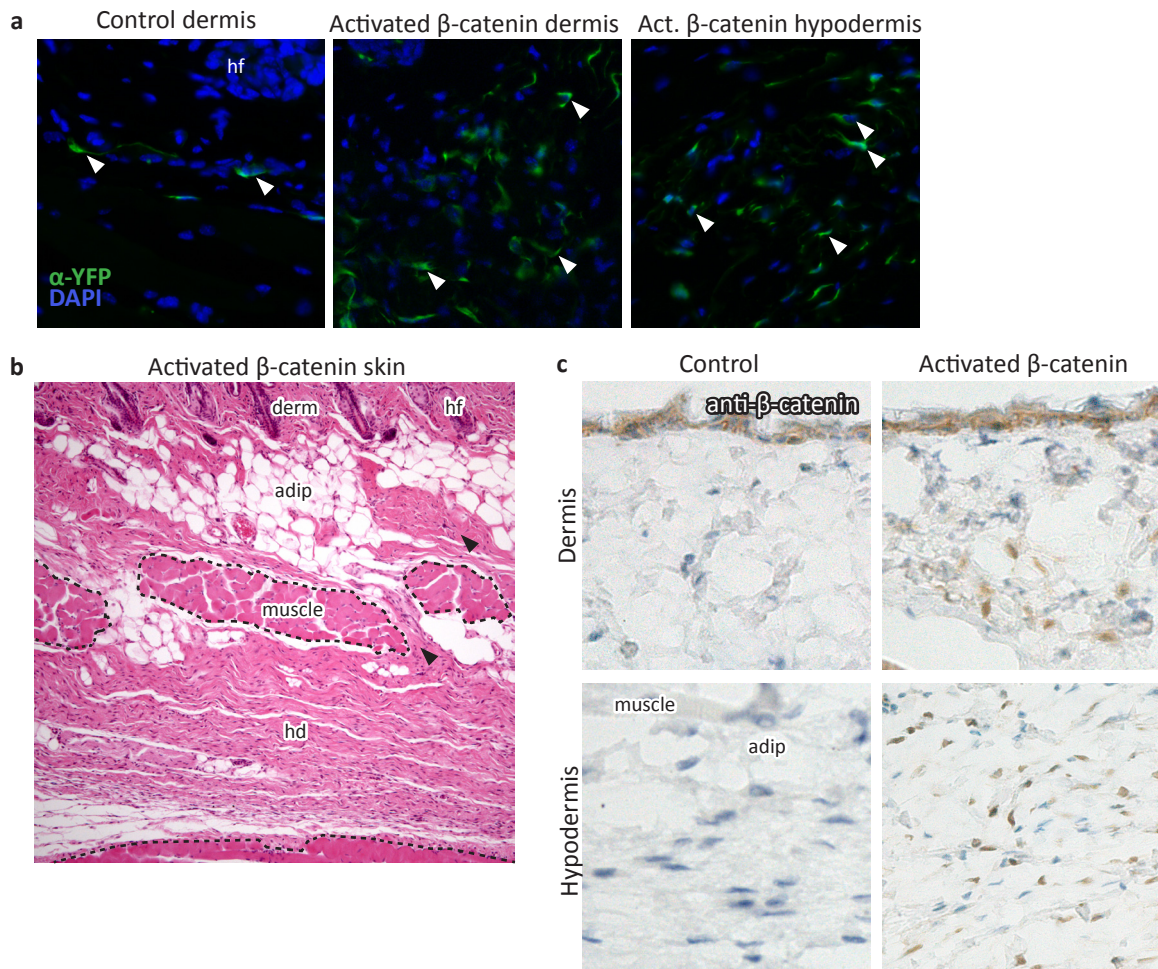

Figure S1.

Characterization of fibrotic skin phenotype. (a) Indirect immunofluorescence using anti-GFP antibody against YFP showed genetic recombination of dermal fibroblasts (arrowheads) in P50 control dermis and mutant dermis and hypodermis. hf, hair follicle. (b) H&E staining of  $\beta$ -catenin-stabilized skin showing invasive fibrous tissue (arrowheads). (c) Nuclear  $\beta$ -catenin-immunoreactive fibroblast nuclei (brown stain) in P51 mutant dermis and hypodermis compared to age- and littermate-matched controls. Control and mutant skin sections were photographed at the same magnification for all corresponding images.
